1     Inhibiting adult neurogenesis differentially affects spatial  
2                     learning in females and males

3  
4

5 Timothy P O’Leary, Baran Askari, Bonnie Lee, Kathryn Darby, Cypress Knudson, Alyssa  
6 M Ash, Desiree R Seib, Delane F Espinueva, Jason S Snyder\*

7  
8  
9

10 Department of Psychology  
11 Djavad Mowafaghian Centre for Brain Health  
12 University of British Columbia  
13 Vancouver, BC, Canada

14  
15

16 \*Corresponding author  
17 email: [jasonsnyder@psych.ubc.ca](mailto:jasonsnyder@psych.ubc.ca)

18  
19  
20

21 ABSTRACT

22

23 Adult hippocampal neurogenesis has been implicated in the spatial processing  
24 functions of the hippocampus but ablating neurogenesis does not consistently lead to  
25 behavioral deficits in spatial tasks. Parallel studies have shown that adult-born neurons  
26 also regulate behavioral responses to stressful and aversive stimuli. We therefore  
27 hypothesized that spatial functions of adult-born neurons may be more prominent  
28 under conditions of stress, and may differ between males and females given  
29 established sex differences in stress responding. To test this we trained intact and  
30 neurogenesis-deficient rats in the spatial water maze at temperatures that vary in their  
31 degree of aversiveness. At standard temperatures (25°C) ablating neurogenesis did not  
32 alter learning and memory in either sex, consistent with prior work. However, in cold  
33 water (16°C), ablating neurogenesis had divergent sex-dependent effects: relative to  
34 intact rats, male neurogenesis-deficient rats were slower to escape and female  
35 neurogenesis-deficient rats were faster. Neurogenesis promoted temperature-related  
36 changes in search strategy in females, but it promoted search strategy stability in  
37 males. Females displayed greater recruitment of the dorsal hippocampus than males,  
38 particularly at 16°C. However, blocking neurogenesis did not alter activity-dependent  
39 immediate-early gene expression in either sex. Finally, morphological analyses of  
40 retrovirally-labelled neurons revealed greater experience-dependent plasticity in new  
41 neurons in males. Neurons had comparable morphology in untrained rats but 16°C  
42 training increased spine density, and 25°C training caused shrinkage of mossy fiber  
43 presynaptic terminals, specifically in males. Collectively, these findings indicate that  
44 neurogenesis functions in memory are prominent under conditions of stress, they  
45 provide the first evidence for sex differences in the behavioral function of newborn  
46 neurons, and they suggest possibly distinct roles for neurogenesis in cognition and  
47 mental health in males and females.

## 48 INTRODUCTION

49

50 Adult hippocampal neurogenesis has been implicated in many of the mnemonic functions of  
51 the hippocampus, including memory for temporal events (1–3), locations (4), contexts (5, 6),  
52 objects (7, 8) and conspecifics (9), as well as the consolidation (10, 11) and forgetting (12) of  
53 memory. While spatial memory functions may be particularly apparent in conditions that  
54 maximize conflict or interference, such as when a goal changes location (13–16), it is notable  
55 that many of studies have failed to find a role for new neurons in learning and short-term  
56 reference memory in the spatial water maze, a task that is highly sensitive to hippocampal  
57 disruption (2, 6, 7, 17–22).

58 A relatively independent body of work has focused on the role of neurogenesis in  
59 emotional and stress-related behavior, finding that neurogenesis buffers the endocrine  
60 response to acute stressors and reduces depressive- and anxiety-like behavior (23–29). Since  
61 stress and emotion potently modulate learning and memory (30, 31), here we hypothesized  
62 that a role for neurogenesis in spatial learning may become particularly apparent in more  
63 aversive conditions. Consistent with this possibility, a small number of studies have found that  
64 neurogenesis does alter behavior in memory tasks depending on the aversiveness of  
65 conditioned and unconditioned stimuli that are present (3, 32, 33).

66 Stress-related disorders such as anxiety, PTSD and depression impact a substantial  
67 fraction of the population. Critically, these disorders affect females to a greater extent than  
68 males, suggesting that neurogenesis functions in stress may be particularly relevant for female  
69 cognition and mental health (34). Indeed, there are known sex differences in the rates of  
70 addition (35), maturation (36) and activation of adult-born neurons (37). Furthermore, sex  
71 modulates hippocampal plasticity (38–41) and behavioral responses to acute and chronic stress  
72 (42–44). However, as is the case in neuroscience more broadly (45), the majority of  
73 neurogenesis studies have focused on males (46). In a quantitative survey of the neurogenesis  
74 literature we find that males are studied twice as often as females, less than 10% of studies  
75 have reported data by sex, and more than 20% of studies do not report the sex of their  
76 subjects (Fig. 1). To our knowledge, no sex differences in behavior have been reported in  
77 animals that have specific reductions in adult neurogenesis. One study has found reduced  
78 neurogenesis is associated with female-specific impairments in adult learning (47). However,  
79 this was in response to neurogenesis ablation beginning in infancy, raising the question of  
80 whether sex differences may also occur in response to neurogenesis ablation in adulthood.

81 To address these outstanding issues we used a pharmacogenetic GFAP-TK rat model to  
82 block adult neurogenesis (48), and tested male and female rats in the water maze at warm  
83 (25°C, standard) or cold (16°C, more aversive/stressful) temperatures. Consistent with previous  
84 work, neurogenesis-deficient rats were unimpaired at standard water maze temperatures.  
85 However, cold water testing revealed striking sex differences in the behavioral function of adult  
86 neurogenesis, and also elicited distinct dorsoventral patterns of hippocampal recruitment and  
87 new neuron plasticity in males and females.

88

89

## 90 METHODS

91

### 92 Subjects

93 This study used male and female transgenic GFAP-TK ("TK") and wild-type ("WT") rats on a  
94 Long-Evans background (48). Here, a GFAP promoter drives expression of herpes simplex virus  
95 thymidine kinase in radial-glia precursor cells, enabling these cells to be killed when rats are  
96 treated with valganciclovir and the cells attempt mitosis. Rats were bred in-house, by crossing  
97 heterozygous transgenic females with WT males. After weaning (postnatal day 21) rats were  
98 housed in same-sex groups of 2-3 in polyurethane cages (48 cm x 27 cm x 20 cm), with aspen  
99 chip bedding, a polycarbonate tube for enrichment, and ad-libitum access to food and water.  
100 Animals were housed under a 12-hour light:dark cycle, and all testing was completed during  
101 the light phase. Rats were genotyped via PCR after weaning and, therefore, housed randomly  
102 with respect to genotype. Prior to all experiments, animals were handled 5 min/day for 5 days.  
103 Experimental procedures were approved by the University of British Columbia Animal Care  
104 Committee and followed guidelines from the Canadian Council of Animal Care on the ethical  
105 treatment of animals.

106

### 107 Valganciclovir treatment

108 For experiments with neurogenesis ablation, animals were treated orally with pellets of  
109 valganciclovir (4 mg) in a 1:1 peanut butter and rodent chow mix (0.5 g). Drug pellets were  
110 given directly to each animal to ensure accurate dosing. Animals began treatment at 6-7 weeks  
111 of age, and were treated twice a week (3-4 day interval) for 6-7 weeks before behavioral testing  
112 began. Valganciclovir treatment stopped immediately prior to behavioral testing. In control  
113 experiments without neurogenesis ablation, rats received neither valganciclovir nor peanut  
114 butter and rodent chow mix.

115

### 116 Spatial water maze testing

117 The water maze consisted of a white circular pool (180 cm diameter), with 60 cm high walls.  
118 The pool was filled with water to a 32 cm depth, and the water was made opaque with addition  
119 of white non-toxic liquid tempera paint (Schola). Training contexts of high- or moderate-stress  
120 were created by using either 16°C or 25°C water, respectively, similar to previous work (49, 50).  
121 The pool was located in a room (~4m x 6m in size) with diffuse lighting, and contained extra-  
122 maze visual cues along the room's walls and distributed within the room (desk, computer,  
123 cabinets). A circular escape platform (12 cm diameter) was placed in the NE quadrant of the  
124 pool, and was positioned 2 cm below the water surface. Rats received 3 days of acquisition  
125 training with 4 trials per day. Rats were tested in groups of 2-3, and during daily training  
126 sessions were placed into individual holding cages filled with aspen chip bedding and paper  
127 towel.

128 For each trial, rats were placed into the pool at one of four possible release locations  
129 (pseudo-random order), with each release location occurring once on each day. Rats were  
130 given a maximum of 60 sec to locate the escape platform, after which they were guided to the  
131 escape platform by the experimenter. Following each trial, rats remained on the escape  
132 platform for ~10 sec, and were gently dried with a towel before being returned to their holding

133 cage for the inter-trial interval (30-90 sec). The rats' trajectory was recorded with an Ethovision  
134 (Noldus) tracking system, and performance was assessed via latency to locate the escape  
135 platform and swim speed. Ideal path error (conceptually similar to cumulative search error /  
136 proximity metrics (51)), which can detect spatial performance differences between trials that  
137 have similar latencies and distances (52), was calculated with Pathfinder software as follows: the  
138 distance from the platform was summed over all samples to obtain a cumulative distance  
139 metric. To control for different release locations, the cumulative distance for the optimal path  
140 was also calculated based on a direct escape path from the release location and the average  
141 swim speed. The ideal path error was then calculated by subtracting the cumulative optimal  
142 path from the cumulative actual path. On the day following acquisition training the platform  
143 was removed from the pool and rats completed a 60 sec probe trial to assess memory. Spatial  
144 memory was measured as the time spent in a 36 cm zone surrounding the former escape  
145 platform location, and the corresponding 36 cm zones in each of the non-target quadrants.  
146 Rats were euthanized 60 minutes after the probe trial in order to capture experience-  
147 dependent Fos expression in activated neurons (see *Immunohistochemistry*, below).

148

#### 149 Search strategy analyses

150 Navigational search strategies employed in the water maze were detected using Pathfinder  
151 software (52), with the following parameters: angular corridor width: 45°, chaining annulus  
152 width: 45cm, thigmotaxis zone width: 15cm, Direct Swim maximum ideal path error: 125, max  
153 heading error: 35°; Focal Search max distance to swim path centroid: 30, max distance to goal:  
154 30, min distance covered: 100cm, max distance covered: 500cm; Directed Search min time in  
155 angular corridor: 70%, max distance covered: 400cm, max ideal path error: 1500; Indirect  
156 Search max ideal path error: 450, max average heading error: 70°; Semi-Focal Search max  
157 distance to swim path centroid: 60, max distance to goal: 60, min distance covered: 200cm,  
158 max distance covered: 5000cm; Chaining min time in annulus: 70%, min quadrants visited: 4,  
159 max area of maze traversed: 40%; Scanning max area of maze traversed: 20%, min area of  
160 maze traversed: 0%, max average distance to maze center: 60; Thigmotaxis time in full zone:  
161 60%, time in smaller zone: 0%, min total distance covered: 400cm. Random search min area of  
162 maze traversed: 5%. The small number of trials that were not categorized by Pathfinder were  
163 designated as random.

164 To visualize the change in usage of a given strategy,  $S$ , caused by reducing  
165 neurogenesis, weighted difference scores were calculated as:  
166  $(\% \text{ trials } S_{TK} - \% \text{ trials } S_{WT}) / \% \text{ trials } S_{WT} \times (\# \text{ trials } S_{WT+TK}) / (\# \text{ trials total}_{WT+TK}) \times 100$ . In other words,  
167 strategy difference scores were weighted against their relative frequency, to prevent  
168 overrepresentation of differences that occurred on only a small proportion of the total trials.

169

#### 170 Retrovirus injections

171 Moloney Murine Leukemia-Virus retrovirus, produced as recently described (53), was used to  
172 express eGFP in adult-born neurons. Viral titers ranged from 1 to  $8 \times 10^6$  colony forming  
173 units/ml. Eight-week-old male and female rats were bilaterally injected with 1  $\mu$ l of retrovirus  
174 into the dorsal dentate gyrus (anteroposterior = -4.0 mm; mediolateral =  $\pm 3.0$  mm;  
175 dorsoventral = -3.5 mm from bregma). Thirty days later, rats either remained in their home

176 cage or were trained and tested for 4 days in the 16°C or 25°C water maze, as above. Rats  
177 were perfused the next day, when cells were 35 days old.

178

#### 179 Blood sampling and radioimmunoassays

180 In one group of rats, different from those used to generate the main behavioral data in Figures  
181 2-3, blood samples were obtained 30 min following testing sessions on days 1 and 3 of  
182 acquisition training and after the probe trial on day 4. After the last trial of a training session  
183 was completed, rats remained in the testing room for 5 min, before being returned to their  
184 home-cage and colony room for the remaining 25 min. Rats were then quickly brought into the  
185 hallway adjacent to the colony room, restrained, and blood was collected via tail vein puncture.  
186 For baseline circadian measurements, home cage control rats were sampled directly from their  
187 cage without transport. Blood was left at room temperature for 30-45 min, centrifuged, and  
188 serum supernatant was collected and stored at -80°C until analyzed by radioimmunoassay  
189 (RIA). RIAs were completed using a  $^{125}$ I corticosterone competitive binding assay (MP  
190 Biomedical). In a subset of animals, body temperature was also obtained immediately following  
191 blood sampling using a rectal thermometer.

192

#### 193 Vaginal lavage and estrous staging

194 Vaginal lavages were completed on female rats within 1-6 hours of completing the probe trial.  
195 Rats were gently wrapped in a towel and rotated so that the vagina was clearly visible. The  
196 vagina was then flushed with tap water using a glass transfer pipette with a smooth, curved tip.  
197 The water was then aspirated into the pipette and collected on a glass slide. The samples were  
198 left to dry for at least 24 hours before being stained in cresyl violet (0.1% for 1 min). For  
199 animals that were used in Figures 3-6, lavages were performed immediately prior to euthanasia  
200 and perfusion, to prevent any effects of lavage on water maze behavior or experience-  
201 dependent Fos expression. Additionally, only a portion of the animals that were used for these  
202 figures were lavaged. For animals that were used for corticosterone measurements, lavage was  
203 performed at the same time blood was collected. Identification of estrous cycle stage was  
204 completed based on the cytology of lavages, as described (54), using an Olympus CX41 light  
205 microscope. Briefly, proestrus was identified based on the presence of round squamish cells  
206 with visible nuclei, estrous with cornified squamish cells without visible nuclei, metestrus with  
207 both cornified squamish cells and leukocytes and diestrus with squamish cells that have visible  
208 nuclei and leukocytes.

209

#### 210 Immunohistochemistry

211 Animals were euthanized via overdose of isoflurane, and transcardially perfused with 4%  
212 paraformaldehyde in 0.1M phosphate buffer saline solution (PBS, pH 7.4). Brains were  
213 dissected and incubated in 4% paraformaldehyde for an additional 24 hours, after which they  
214 were placed in PBS with 0.1% sodium azide, and stored at 4°C. Prior to sectioning, brains were  
215 cryoprotected by incubation in 10% glycerol in PBS for 24 hours, followed by 20% glycerol for  
216 48 hours. Brains were sectioned coronally through the hippocampus at 40  $\mu$ m thickness using a  
217 freezing microtome and stored in cryoprotectant solution at -20°C until immunohistochemistry  
218 was completed.

219 For immunolabelling of doublecortin (DCX), one dorsal and one ventral section from  
220 each animal was mounted onto slides (Fisher, Superfrost) and left to dry for 24 hours. Slides  
221 were incubated in 0.1M citric acid and heated to an intermittent boil for 10 min for antigen-  
222 retrieval. Sections were then washed and incubated in PBS with 0.5% triton-X and 3% horse  
223 serum for 20 min. Tissue was then incubated in PBS with triton-X, with mouse-anti DCX  
224 monoclonal antibody (Santa Cruz Biotechnology, sc-271390, 1:100) at 4°C for 3 days. Sections  
225 were then rinsed in PBS, and incubated in biotinylated goat anti-mouse secondary antibody  
226 (Sigma, B0529,1:200) for 1 hour. Sections were washed, and treated with hydrogen peroxide  
227 (0.3%) in PBS for 30 min. Immunostaining was visualized through incubation in avidin-biotin-  
228 horseradish peroxidase (Vector Laboratories, Burlingame, CA) for 30 min, and subsequent  
229 treatment with cobalt-enhanced 3,3'-Diaminobenzidine chromogen (Sigma Fast Tablets,  
230 Sigma, St. Louis, MO). Sections were then counter-stained with cresyl-violet (0.1%),  
231 dehydrated, cleared with citrisolv (Thermofisher, Waltham, MA) and coverslipped with  
232 permount (Fisher).

233 For immunostaining of GFP, serial sections were incubated in mouse anti-GFP (DSHB,  
234 GFP-12E6, 1:100 in PBS with triton-X) for 24 hours, washed, incubated for 2 hours with donkey  
235 anti-mouse Alexa488 secondary antibody, washed, mounted onto slides and coverslipped with  
236 PVA-DABCO.

237 For immunostaining of c-Fos, sections were incubated in goat anti-c-Fos primary  
238 antibody (1:2000, Santa Cruz sc-52-G) in PBS-TX with horse serum for 3 days at 4°C. Sections  
239 were then washed 3 times in PBS-TX, and then incubated in secondary biotinylated donkey  
240 anti-goat antibody (1:250, Jackson ImmunoResearch: 705-065-147) for 1 hour in PBS-TX with  
241 horse serum. The sections were then washed 3 times in PBS-TX, incubated in blocking solution  
242 (0.5%, Perkin Elmer: FP1020) for 30 min, before application of Streptavidin-HRP (1:100,  
243 NEL750) for 1 hour. Sections were then washed (3 x 5min) in PBS-TX, and incubated in  
244 Rhodamine (1:2000, Fisher Scientific: PI-46406) in PBS-TX and H<sub>2</sub>O<sub>2</sub> (1:20,000) for 1 hour.  
245 Sections were then washed (3 x 5min) in PBS-TX, blocked for 30min in PBS-TX with horse  
246 serum, and then incubated in mouse anti-GAD67 primary antibody (1:1000, Millipore  
247 MAB5406) in PBS-TX with horse serum for 3 days at 4°C. Following GAD67 antibody  
248 incubation, sections were then washed 3 times in PBS-TX, and incubated in donkey anti-mouse  
249 Alexa 647 antibody (1:250, Invitrogen A-31571) for 1 hour. Tissue was then washed in PBS-TX  
250 (3 x 5min), and incubated in DAPI (1:1000) for 10 min. Lastly, sections were washed for (3 x  
251 5min) in PBS, mounted onto glass slides, and coverslipped using PVA-Dabco mounting  
252 medium.

### 253 254 Quantification of immunolabelling

255 Quantification of all immunolabelling was completed by an experimenter blind to the  
256 experimental conditions. For DCX, the number of immuno-positive cells was counted within  
257 the granule cell layer of the DG, using an Olympus CX41 bright-field microscope with a 40x  
258 objective. The number of immuno-positive cells were counted from 1 section of the  
259 septal/dorsal hippocampus (Bregma, -2.92 to -4.0 mm). Counts of DCX cells were also  
260 obtained from hippocampal sections which contained temporal/ventral hippocampus, although  
261 counts were not separated between the supra- and infra-pyramidal blades (Bregma, -5.76 to -

262 6.2 mm). Intermediate and ventral DG was delineated at 4.5 mm relative to the interaural line.  
263 All counts of DCX positive cells were converted into densities based on the volume of the DG  
264 subregions.

265 For quantification of Fos immunoreactivity, a confocal microscope (Leica, SP8) was used  
266 to obtain representative z-stacks (40x objective), through the entire infrapyramidal and  
267 suprapyramidal blades of the DG, the medial and lateral blades of the ventral DG, and dorsal  
268 and ventral CA3. For each animal, an entire dorsal and ventral section was analyzed. Cells were  
269 counted as Fos-positive when the intensity of immunolabelling was more than twice that of  
270 neighboring, non-nuclei-containing, tissue in the hilus. To determine the percentage of GAD  
271 cells that also expressed Fos, Gad immunopositive cells were examined throughout the entire  
272 DG-CA3 and the proportion that expressed Fos at twice background levels was quantified.

273 Analyses of dendritic spine density were performed from z-stack images acquired with a  
274 63x glycerol-immersion objective (NA 1.3). Images were 1024x1024 pixels in size, taken at 5x  
275 zoom, a speed of 400 Hz, and a z-height of 0.5  $\mu\text{m}$ . For each neuron, images were acquired  
276 from the outer molecular layer (where lateral perforant path axons terminate), middle molecular  
277 layer (where medial perforant path axons terminate), and inner molecular layer (where mossy  
278 cell / commissural fibers terminate). All protrusions were counted as spines and mushroom  
279 spines were defined as having a head diameter  $\geq 0.6 \mu\text{m}$ . A total of 14-37 cells per group,  
280 distributed equally across 3-5 animals/group, were analyzed.

281 Analyses of mossy fiber terminals were performed from z-stack images acquired with a  
282 40x oil-immersion objective (NA 1.3). Images were 1024x1024 pixels in size, taken at 2x zoom,  
283 a speed of 400 Hz, and a z-height of 0.5  $\mu\text{m}$ . The area of the large mossy terminal was  
284 measured from maximum intensity projections and the number of terminal-associated  
285 filopodia, more than 1 $\mu\text{m}$  in length, was also quantified as a proxy for GABAergic interneuron  
286 innervation (55, 56). Large mossy terminals and filopodia were categorized according to their  
287 position along the proximodistal CA3 axis, where CA3a is the curved distal portion of CA3,  
288 CA3c is proximal and enclosed within the blades of the DG, and CA3b is the intermediate CA3  
289 region. A total of 59-122 large mossy terminals per group, distributed equally across 3-5  
290 animals/group, were analyzed.

## 291 Statistical Analysis

293 Analysis of water maze acquisition performance was performed using mixed-design repeated  
294 measures ANOVA with sex and genotype as between-subject factors and day of training as a  
295 within subject factor. The distribution of search strategies in WT and TK rats was analyzed by a  
296 Chi squared test with Bonferroni correction for multiple comparisons. Probe trial performance  
297 was analyzed with between-subject ANOVAs (sex x genotype). For behavioral experiments,  
298 16°C and 25°C groups were typically analyzed and presented separately; in some cases we  
299 directly compared 16°C and 25°C groups to explore temperature effects. Cell densities were  
300 analyzed by mixed design repeated measures ANOVA with sex and genotype as between  
301 subject factors and dorsoventral subregion as a within subjects factor. Neuronal morphology  
302 (spines, boutons, filopodia) was analyzed by ANOVA with sex and treatment as between-  
303 subjects factors. For all ANOVAs, where significant interactions were detected, post-hoc  
304 comparisons were analyzed with Holm-Sidak tests. The significance level,  $\alpha$ , was set at  $p=0.05$



305 for all tests. In most cases, statistical results are presented in the figure legends alongside their  
306 respective data; for data that is not presented in figures, statistical results are presented in the  
307 results text.

308

### 309 Sex and neurogenesis literature summary

310 To assess the degree to which sex has been included as a variable in studies of adult  
311 neurogenesis (Fig. 1), a Pubmed search was performed using the search terms "neurogenesis"  
312 and "dentate gyrus". Results were binned into 5-year increments from 2001 to 2020 and 76-  
313 112 studies/bin (mean=98, distributed equally over the 5 years of a bin) were examined for  
314 whether they studied male, female or both male and female subjects, whether they formally  
315 analyzed their data by sex, or whether they did not report the sex of their subjects. To similarly  
316 assess inclusion of males and females in studies that have attempted to specifically manipulate  
317 neurogenesis and test behavioral consequences ("functional studies"), additional search terms  
318 were included ('irradiation', 'tk', 'tmz', 'mam', 'arac', 'tamoxifen', 'chemogenetics', and  
319 'optogenetics'; 97 results published between 2001 and 2021).

320

321

## 322 RESULTS

323

### 324 Inhibition of neurogenesis in male and female TK rats.

325 To establish that neurogenesis was effectively inhibited along the dorsoventral axis of the DG  
326 in both male and female TK rats, we quantified the density of cells expressing the immature  
327 neuronal marker, doublecortin (DCX). As expected, in WT rats DCX<sup>+</sup> cells were observed at the  
328 border of the granule cell layer and the hilus, in the subgranular zone (Fig. 2A). DCX<sup>+</sup> cell  
329 density was dramatically reduced in both male and female TK rats, to less than 15% of levels  
330 found in WT littermates, consistent with recent work (48, 53, 57). This reduction was observed  
331 in the dorsal and ventral hippocampus, and there were no sex differences in the extent of  
332 neurogenesis reduction (Fig. 2B).

333

### 334 In cold water, ablation of neurogenesis impairs spatial learning in male rats and improves 335 spatial learning in female rats

336 Ablating neurogenesis typically does not impair learning a single spatial location in the water  
337 maze (2, 6, 7, 17–22). Since adult-born neurons regulate unconditioned responses to stressors  
338 (3, 23, 32), we hypothesized that stress or aversiveness may also reveal a role for new neurons  
339 in spatial learning. We therefore tested WT and TK rats in the spatial water maze at standard  
340 temperatures (25°C) or colder, more aversive temperatures (16°C).

341 In standard 25°C water, WT and TK rats learned to escape from the pool with similar  
342 latencies (Fig. 3A-C) and, in the probe trial, WT and TK rats displayed equivalent memory (Fig.  
343 3D-F). We also observed sex differences in performance, where males escaped faster and  
344 spent more time in the target zone than females. We explored whether estrous stages  
345 influenced probe trial performance (but not after training trials, to avoid lavage impacts on  
346 subsequent behavior). The distribution of WT and TK rats across the 4 stages of the estrous  
347 cycle did not differ ( $\chi^2=1.3$ ,  $P=0.7$ ) but rats in proestrus displayed better memory than rats that  
348 were not in proestrus, an effect that was comparable for both WT and TK rats (Fig. 3G).

349 At 16°C, blocking neurogenesis altered learning in both males and females, but in  
350 opposite directions: male TK rats located the platform faster but female TK rats located it  
351 faster, compared to their WT counterparts (Fig. 4A-C). As in 25°C water, WT male rats located  
352 the platform faster than WT females. These effects could not be explained by differences in  
353 swim speed (Supplementary Fig. 1). A similar pattern was observed when we analyzed ideal  
354 path error, a measure of the cumulative positional error relative to the platform that is not  
355 influenced by differences in swim speed or path length (52): at 16°C female TK rats had a lower  
356 path error and male TK rats had a greater path error, relative to WT controls (Supplementary  
357 Fig. 2).

358 On the probe trial, TK rats spent less time searching in the target zone (Fig. 4D-F). This  
359 pattern was stronger in male TK rats but the ANOVA interaction (sex x time spent in target  
360 zone) was not significant. Following the 16°C probe trial, the estrous distribution of female WT  
361 and TK rats did not differ ( $\chi^2=2.7$ ,  $P=0.4$ ) and there was no effect of estrous stage on probe  
362 trial performance (Fig. 4G).

363 To rule out the possibility that behavioral differences were due to nonspecific  
364 physiological effects caused by cold water, we measured body temperature in a separate

365 group of rats. At both 16°C and 25°C, body temperature was lowest after day 1 training, was  
366 lower on day 1 in females than in males, but not different between WT and TK rats  
367 (Supplementary Fig. 3). Male TK rats weighed slightly less than male WT rats, consistent with  
368 previous studies showing that neurogenesis inhibition can sometimes reduce weight (19, 48)  
369 (8%; WT: 480 ± 8g, TK: 441 ± 8g; mean ± s.e.m.). However, female WT and TK rats were not  
370 different (3%; WT: 279 ± 5g, TK: 270 ± 6g; 2 way ANOVA; effect of genotype:  $F_{1,116}=11$ ,  
371  $P=0.001$ ; genotype x sex interaction:  $F_{1,116}=4$ ,  $P=0.049$ ; female WT vs TK:  $P=0.6$ ; male WT vs  
372 TK:  $P=0.0001$ ). Furthermore, neither body weight nor body temperature correlated with  
373 learning and memory performance at 16°C or 25°C, suggesting that water temperature did not  
374 differentially impact sexes or genotypes due to hypothermic effects (Supplementary Tables 1 &  
375 2). Finally, to rule out the possibility that TK impairments and enhancements in learning are due  
376 to nonspecific effects of the GFAP-TK transgene, we trained additional WT and TK rats that did  
377 not receive valganciclovir treatment. Here, no genotype differences were observed at 16°C or  
378 25°C water temperatures (Supplementary Fig. 4).

379 To gain insight into navigational strategies employed during learning, we analyzed  
380 search patterns with Pathfinder software (52). Generally, rats displayed increasing use of  
381 spatially-specific search strategies over days of testing (Fig. 5). Specifically, they shifted from  
382 thigmotaxic and random searches, or searches that covered multiple areas of the pool equally,  
383 to searches that were biased towards the escape platform with increasing precision. Male TK  
384 rats relied less on spatially-specific search strategies than their WT counterparts. Consistent  
385 with their faster escape latency, female TK rats tended to display more spatially-specific  
386 searches than their WT counterparts but this difference was not statistically significant.  
387 Consistent with the latency and path error data, search strategies did not differ between WT  
388 and TK rats tested at 25°C (Supplementary Fig. 5).

389 Behavioral sex differences often reflect differences in strategy (58, 59). We therefore  
390 explored whether maze aversiveness caused males and females to employ different  
391 navigational strategies in the water maze. Female WT rats responded strongly to cold  
392 temperature, and spent less time searching randomly and at the edge of the pool, and more  
393 time performing spatial searches in the center of the pool and near the platform. Temperature-  
394 dependent changes in search strategy were absent in female TK that lacked neurogenesis  
395 (Supplementary Fig. 6). In contrast, male WT rats employed similar strategies at both 16°C and  
396 25°C, but blocking neurogenesis led to temperature-dependent differences, where TK males  
397 performed fewer spatially precise searches in 16°C water. Thus, neurogenesis promotes  
398 aversiveness-related changes in search strategy in females but it promotes consistent search  
399 strategies in males.

400

#### 401 Blocking neurogenesis did not alter the HPA response.

402 Neurogenesis regulates the HPA axis in mice (23) and cold temperatures can enhance water  
403 maze learning via glucocorticoid-dependent mechanisms (49). We therefore explored whether  
404 neurogenesis regulates HPA axis function in rats at baseline and after learning. Consistent with  
405 previous work in mice (23), we found no neurogenesis-related changes in baseline circadian  
406 HPA function. Corticosterone levels were highest at the onset of darkness, they were higher in  
407 females, but they did not differ between WT and TK rats (Supplementary Fig. 7). When

408 corticosterone was measured 30 min after the first day of acquisition training, both WT and TK  
409 rats displayed high levels of corticosterone, which did not differ between genotypes.  
410 Corticosterone levels also did not differ between rats trained at 16°C vs 25°C. When  
411 normalized to escape latency, i.e. time spent in the water, there was a tendency for greater  
412 corticosterone levels at 16°C but this did not reach statistical significance. A subset of rats that  
413 were subjected to the full 4 days of testing displayed HPA habituation, but no corticosterone  
414 differences were observed between genotypes or temperatures. Thus, females elicit a stronger  
415 HPA response than males, but neurogenesis-associated behavioral differences at 16°C are not  
416 due to differences in HPA output.

417

418 Activity-induced Fos expression is modulated by sex and dorsoventral location, but not  
419 neurogenesis.

420 Behaviorally-relevant DG neuronal populations express the activity-dependent immediate-early  
421 gene, c-Fos (60–62). To determine whether blocking neurogenesis alters neuronal population  
422 activity in males and females, we quantified Fos expression in excitatory principal cell  
423 populations in DG-CA3, in both WT and TK rats (Fig. 6). Notably, Fos activation was never  
424 different between WT and TK rats. However, more dentate granule neurons were active in  
425 females than in males, particularly at 16°C (74% more at 16°C, 24% more at 25°C). There were  
426 also strong dorsoventral gradients of activity: at 16°C, females had ~2x greater Fos levels in  
427 the dorsal DG compared to the ventral DG or the dorsal DG of males. In contrast, males  
428 trained at 16°C did not display a significant dorsoventral gradient of activity. At 25°C, females  
429 also displayed a strong dorsoventral gradient of activity but in males this effect was weaker  
430 with only TK rats having significantly greater Fos activation in the dorsal DG. To explore  
431 whether Fos levels differed across training temperatures, we pooled genotypes and performed  
432 a sex x temperature ANOVA (dorsal and ventral subregions combined). A significant interaction  
433 revealed that females had more Fos<sup>+</sup> cells when trained at 16°C than at 25°C; males did not  
434 differ (effect of sex:  $F_{1,91}=30$ ,  $P<0.0001$ , effect of temperature:  $F_{1,91}=3.3$ ,  $P=0.07$ ; interaction  
435  $F_{1,91}=6.8$ ,  $P=0.01$ ; female 16°C vs 25°C:  $P=0.008$ ; male 16°C vs 25°C:  $P=0.95$ ). Since a shift in  
436 reliance on the ventral-to-dorsal hippocampus mediates the progression toward spatially-  
437 specific search strategies (63), we explored relationships between Fos activation of dorsal vs  
438 ventral hippocampus with performance on the acquisition and retrieval stages of testing,  
439 however, no significant correlations were observed (data not shown).

440 Since adult-born neurons can influence DG-CA3 activity via efferent connections with  
441 inhibitory interneurons (56, 64), we quantified Fos<sup>+</sup> inhibitory, GAD67-expressing neurons in  
442 DG-CA3 (Fig. 6D,E). In rats trained at 16°C, there was a strong dorsoventral gradient of activity  
443 in GAD67<sup>+</sup> cells, with greater activity in the ventral DG than in the dorsal DG. There was also  
444 significantly greater activation of GAD67<sup>+</sup> cells in females than in males, but no differences due  
445 to loss of adult neurogenesis. Sparse activation precluded a robust subregional analysis but,  
446 when analyzed by DG-CA3 subregion, sex differences in GAD67<sup>+</sup> cell activation were observed  
447 in the molecular layer, granule cell layer and hilus+CA3 (female > male), but the dorsoventral  
448 difference was specific to the granule cell layer (ventral > dorsal; Supplementary Fig. 8A-C). At  
449 25°C, fewer GAD67<sup>+</sup> cells were activated (mixed effects analysis; effect of temperature:  
450  $F_{1,91}=8.2$ ,  $P=0.005$ ) and the dorsoventral gradient (V > D) was weaker. In contrast to rats trained

451 at 16°C, there were no sex differences in activation of GAD67<sup>+</sup> cells in rats trained at 25°C.  
452 Finally, at 25°C there also were no differences between genotypes. A similar pattern was  
453 observed in the granule cell layer and hilus+CA3 region (Supplementary Fig. 8D-F).

454

#### 455 Training- and sex-dependent morphological plasticity in adult-born neurons.

456 Functionally-relevant morphological features of adult-born neurons develop during the weeks  
457 and months post-mitosis (65–67), and can be modified by spatial learning (68, 69). To examine  
458 sex differences in experience-dependent plasticity we labelled adult-born neurons with  
459 retrovirus and analyzed GFP<sup>+</sup> spines and presynaptic terminals as morphological proxies for  
460 afferent and efferent connectivity (Fig. 7). At baseline, in naïve home cage rats, there were no  
461 differences in spine density between adult-born neurons from male and female rats. However,  
462 in male rats, training at 16°C specifically elevated spine density compared to rats that were  
463 untrained or trained at 25°C, and compared to female rats trained at 16°C. This effect was  
464 observed throughout the molecular layer. In both males and females, regardless of treatment,  
465 spine density increased with distance from the cell soma as previously observed (65)  
466 (Supplementary Fig. 10). The density of large, mushroom spines was not altered by training  
467 (Fig. 7C).

468 Finally, we examined the large mossy fiber terminals that excite CA3 pyramidal neurons.  
469 No sex differences were observed between naïve, home cage control rats. However, only in  
470 males, training decreased mossy fiber terminal size, an effect that was greatest in the 25°C  
471 group (Fig. 7D). In both females and males, 25°C training also reduced the number of  
472 filopodial extensions that protrude off of mossy fiber boutons, putative synapses onto  
473 inhibitory interneurons (Fig. 7E).

474

475

476

477 DISCUSSION

478

479 Sex modulates hippocampal memory, plasticity and physiology (70). And while there is also  
480 evidence that sex regulates the addition and activation of new neurons (71), relatively few  
481 studies have formally investigated sex and none have identified sex differences in the  
482 behavioral consequences of manipulating adult neurogenesis (Fig. 1). Here we report that  
483 blocking neurogenesis caused female rats to learn faster and male rats to learn slower, relative  
484 to intact rats in a spatial water maze at aversive 16°C temperatures. These findings were not  
485 confounded by genotype differences in swim speed, body weight or body temperature, and  
486 they were not present in TK rats that were not treated with valganciclovir (and therefore had  
487 intact neurogenesis). Whereas new neurons were morphologically equivalent at baseline,  
488 learning evoked distinct patterns of pre- and post-synaptic plasticity depending on sex. Our  
489 study therefore provides new evidence that adult-born neurons make unique sex-dependent  
490 contributions to spatial learning under stress and have distinct plasticity profiles in male and  
491 female rats.

492

493 Temperature-dependent spatial functions of newborn neurons.

494 While some have reported acquisition and short term reference memory deficits in the spatial  
495 water maze in neurogenesis-deficient animals (14, 69, 72), a majority of studies have found  
496 intact spatial learning (2, 6, 7, 15, 17–22), raising questions about the necessity of adult  
497 neurogenesis for spatial learning. Our findings indicate that the degree of stress and/or  
498 aversiveness present at the time of learning is critical (as suggested by (73)). Indeed, there is  
499 ample evidence that neurogenesis regulates innate fear and anxiety-like behaviors in response  
500 to stressful and aversive stimuli (23–25, 27–29). And while stress is known to potently modulate  
501 hippocampal memory, few studies have examined a role for neurogenesis in learning as a  
502 function of stress: one study found that neurogenesis is critical for context fear memory when  
503 mice receive a single, but not multiple, footshocks (33); another found that TK rats made more  
504 errors in a dry spatial maze only when an aversive odor was present (32). That we found no  
505 learning differences at 25°C suggests that neurogenesis may be particularly important for  
506 spatial learning under conditions of higher stress. Notably, we did not find differences in HPA  
507 activation between rats trained at 16°C and 25°C. However, 16°C training did lead to greater  
508 hippocampal recruitment (in females), greater dorsoventral differences in hippocampal  
509 activation, differences in strategy usage, and it caused a greater reduction in body  
510 temperature. Thus, 16°C water evoked physiological changes and behaviors that are consistent  
511 with the concept of a stressor as a threatening stimulus that perturbs an organism from  
512 baseline, necessitating an adaptive or homeostatic response (74).

513

514 Sex differences in the behavioral function of adult-born neurons.

515 We found that blocking neurogenesis led to opposite behavioral outcomes in females and  
516 males which, to our knowledge, is the first report of sex differences in the behavioral function  
517 of neurogenesis. To date, sex differences in function have gone undetected because few  
518 studies have compared male and female animals that have altered neurogenesis (“functional”  
519 studies). In our attempt to comprehensively survey the literature (Fig. 1), we counted only 4

520 functional studies that have reported data by sex or included sex as a variable in their statistical  
521 analyses (9, 57, 75, 76).

522 It is typically understood that neurogenesis benefits cognition and so it may seem  
523 paradoxical that blocking neurogenesis improved water maze learning in females. However, it  
524 has been repeatedly demonstrated that males and females can display opposite patterns of  
525 hippocampal-dependent learning, with manipulations facilitating performance in males in some  
526 paradigms and facilitating performance in females in others (42–44). Our findings also may  
527 seem paradoxical if it is assumed that “faster is better” in the water maze. It is increasingly well-  
528 documented that sex differences in learning tasks can reflect strategy differences rather than  
529 frank differences in learning ability (58, 77) and escape latencies cannot reveal differences in  
530 strategy and navigational choice that may be highly adaptive (15). Here we found that male  
531 rats that lacked neurogenesis performed more general searches, but female neurogenesis-  
532 deficient rats tended to (nonsignificantly) perform more spatially specific searches. While it is  
533 common to view spatially-specific searches as “better”, generalized search has clear  
534 advantages in cases where a spatial goal moves to a new or unexpected location (78, 79). Thus,  
535 one possibility is that neurogenesis adjusts search/memory specificity differently, increasing it  
536 in males and perhaps decreasing it in females. That females trained at 16°C had significantly  
537 higher levels of Fos in the dorsal DG indicates that there are clear sex differences in regional  
538 hippocampal recruitment, which could impact the adoption of precise search strategies (63).

539 Another possibility, related to the fact that neurogenesis effects were selectively  
540 observed in 16°C water, is that emotional functions of neurogenesis were differentially  
541 engaged by stress. In other studies, stress impairs spatial learning in males and is either without  
542 effect, or actually improves learning, in females (42, 43). These divergent effects may reflect  
543 differential effects of stress on cognition (males) and hyperarousal (females) (80). Since  
544 neurogenesis ablation mimics some features of the stressed brain (e.g. structural atrophy) (81,  
545 82), possibly male learning was impaired by dysregulated integration of stress and learning,  
546 and females learned faster due to heightened arousal and attention effects. A role for  
547 attentional processes is also suggested by recent work showing that blocking neurogenesis  
548 reduces orienting responses to distractor stimuli (83), an effect that may explain why TK rats are  
549 faster to navigate a dry spatial maze in the presence of an aversive, but irrelevant, mint odor  
550 (32). Given sex differences in processing object arrays and configurations (70), blocking  
551 neurogenesis may differentially alter water maze cue processing such that females are less  
552 susceptible to distraction from irrelevant cues (leading to faster escape) but males are less  
553 attentive to relevant cues (leading to slower escape).

554 Finally, insights into the potential adaptive significance of neurogenesis also come from  
555 our analyses across temperatures (Supplementary Fig. 6). Intact females were highly sensitive  
556 to temperature: 16°C shifted females away from random and wall-focused search, toward the  
557 center of the pool and the specific area of the platform. In contrast, TK females were not  
558 different at 16°C and 25°C. Thus, in females, neurogenesis promotes changes in strategy  
559 according to the aversiveness of the situation. In males, neurogenesis promoted equivalent  
560 strategy usage 16°C and 25°C, which could also be adaptive in cases where performance  
561 needs to remain stable despite perturbations from external forces.

562

563 Sex differences in hippocampal subregional activation.

564 To investigate possible subregional and cellular mechanisms we examined activity-dependent  
565 Fos expression along the dorsoventral axis in male and female rats that did, or did not, have  
566 adult neurogenesis. While previous studies have reported that ablating neurogenesis can  
567 increase (13, 27, 64) or decrease (53, 84) activity in the hippocampus, here we found no effect  
568 on global activity amongst dentate granule cells. Newborn neurons also target inhibitory  
569 interneurons (56, 64), whose activity regulates the precision of hippocampal-dependent  
570 memory (85, 86). However, we also observed no changes in inhibitory recruitment in TK rats  
571 relative to WT rats. While these findings suggest that neurogenesis ablation did not affect  
572 behavior by altering hippocampal activity, it is possible that activity differences were present  
573 early in training, when behavioral sex differences were more prominent.

574 Little is known about how dorsoventral subregions of the hippocampus are activated in  
575 males and females by training in the standard spatial water maze. Here, we found that females  
576 consistently had greater levels of DG activity than males, particularly at 16°C. This was largely  
577 driven by elevated Fos levels in the dorsal hippocampus, a finding that builds on previous  
578 evidence that the spatial water maze recruits dorsal more than ventral DG (60). However,  
579 whereas that study only included males, here we find that the dorsoventral gradient is  
580 significantly stronger in females. Elevated Fos in dorsal vs ventral DG was mirrored by an  
581 opposite gradient of Fos in GAD67<sup>+</sup> inhibitory cells, suggesting that regional activity is  
582 controlled by local inhibitory circuits. Since the temporal progression of water maze learning  
583 strategies involves sequential recruitment of ventral to dorsal hippocampus (63) we explored  
584 relationships between water maze performance (latency, path error, strategy specificity on  
585 acquisition and probe trials) and activity in the dorsal and ventral DG. However, we found no  
586 consistent correlations, suggesting that other forms of activity and plasticity may be more  
587 tightly linked to performance.

588

589 Sex differences in morphological plasticity of adult-born neurons.

590 To our knowledge, this is the first study to examine functionally-relevant morphological  
591 features of adult-born neurons in males and females. At baseline, we observed no differences  
592 in spine density or mossy fiber terminal size between the sexes. However, water maze training  
593 induced plasticity of excitatory synaptic structures but only in males. Since blocking  
594 neurogenesis impaired 16°C learning in males, 16°C-induced spinogenesis may be important  
595 for learning under stress in males, possibly allowing for greater association of sensory  
596 information from entorhinal cortical inputs. Somewhat surprisingly, training reduced the size of  
597 mossy fiber terminals in males. These findings are reminiscent of early work showing that the  
598 CA3 pyramidal neuron apical dendrites, which are targeted by mossy fiber axons, undergo  
599 greater stress-induced plasticity in males than in females (87). Given the link between mossy  
600 fiber terminal size and synaptic strength (88, 89), training likely reduced synaptic strength in  
601 male rats trained at 25°C, suggesting that new neurons in males may play a weaker role in  
602 memory under less aversive conditions. Likewise, we observed fewer filopodial protrusions in  
603 both males and females trained at 25°C, suggesting that new neurons are less likely to recruit  
604 inhibitory circuits in less aversive conditions, an effect that could reduce memory precision (85,  
605 86).



606 ACKNOWLEDGEMENTS

607

608 This work was supported by CIHR operating funds (Catalyst Grant: Sex as a variable in  
609 biomedical research) to JSS, a Michael Smith Foundation for Health Research Scholar Award to  
610 JSS, a CIHR New Investigator Award to JSS, and a Michael Smith Foundation for Health  
611 Research Postdoctoral Fellowship to TPO. The authors thank Stephanie Hipkin for assistance  
612 with the Figure 1 literature review.

613 FIGURES

614

615

616

617

618

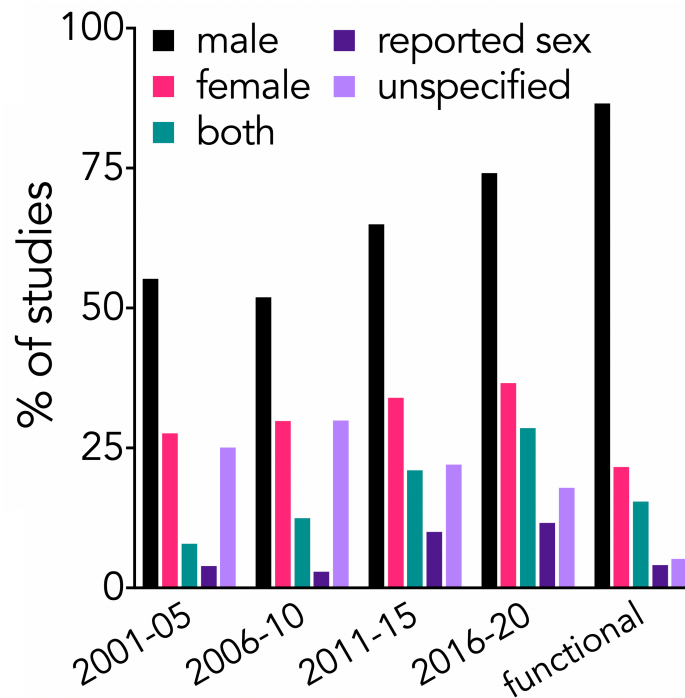

619

620

621

622 **Figure 1: Neurogenesis studies primarily include males.** Over the past 20 years, most studies  
623 have included males, fewer have included females or specifically reported data by sex. A  
624 fraction continue to not specify the sex of their subjects. Similar patterns are seen for  
625 “functional” studies that have manipulated neurogenesis and examined behavioral outcomes.

626

627

628  
629

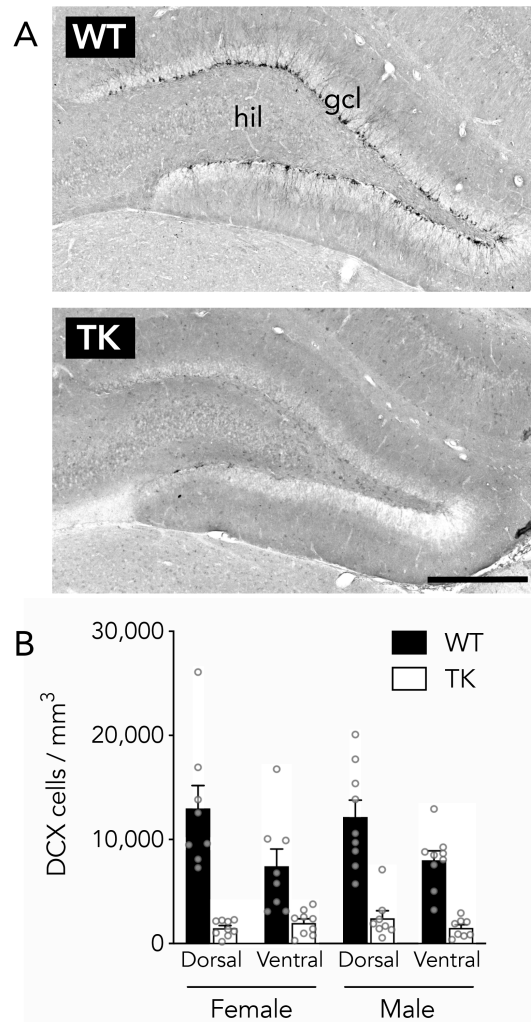

630  
631  
632  
633  
634  
635  
636  
637  
638

**Figure 2: Reduced neurogenesis in male and female GFAP-TK rats.** A) Representative immunostaining for the immature neuronal marker, doublecortin (DCX), in WT (top) and TK (bottom) rats (here, both female). hil, hilus; gcl, granule cell layer; scale bar, 500  $\mu$ m. B) Neurogenesis was suppressed along the dorsoventral axis of both male and female rats (3 way ANOVA; effect of genotype:  $F_{1,30} = 58$ ,  $P < 0.0001$ ; effect of sex:  $F_{1,30} = 0.0$ ,  $P = 0.96$ ; effect of dorsoventral subregion:  $F_{1,30} = 28$ ,  $P < 0.0001$ ; interactions all  $P > 0.15$ ). Bars reflect mean  $\pm$  standard error.

639

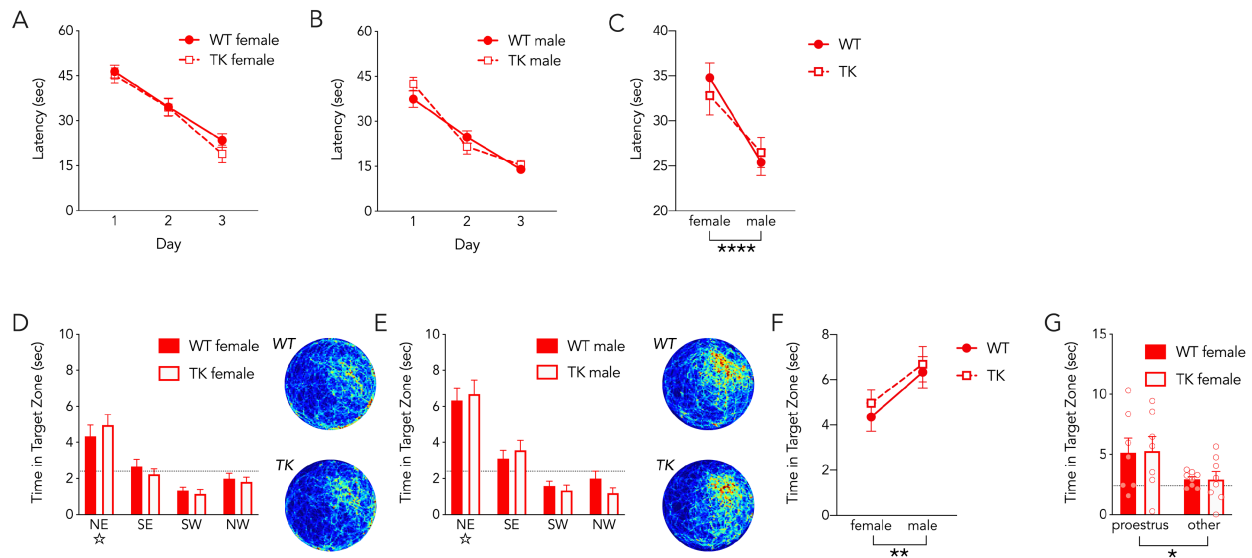

640

641

642

643 **Figure 3: Sex, but not neurogenesis, modulates learning and memory in the 25°C water maze.**

644 During the acquisition phase of water maze training, female (A) and male (B) rats reached the

645 platform faster with successive days of training (3-way anova; effect of day,  $F_{2,152}=157$ ,

646  $P<0.0001$ ). Males reached the platform faster than females (effect of sex,  $F_{1,76}=21$ ,  $P<0.0001$ )

647 but there was no difference between WT and TK rats (effect of genotype,  $F_{1,76}=0.1$ ,  $P=0.8$ ) and

648 no significant interactions between day, sex and genotype (all  $P > 0.1$ ). C) Summary of average

649 trial acquisition latency. D, E) On the probe trial, female (D) and male (E) rats preferentially

650 searched in the target (NE) zone where the platform was located during training. Dotted line

651 indicates chance performance. WT and TK rats did not differ on the probe trial but males spent

652 more time searching in the target zone (2-way anova; effect of genotype,  $F_{1,69} = 0.4$ ,  $P=0.5$ ;

653 effect of sex,  $F_{1,69}=7$ ,  $P=0.0097$ ; interaction,  $F_{1,69}=0$ ,  $P=0.8$ ). F) Summary of probe trial target

654 zone search time for males and females. G) Females in proestrus displayed better memory on

655 the probe trial than rats in other phases of the estrous cycle (2-way anova; effect of genotype,

656  $F_{1,26} = 0$ ,  $P=0.9$ ; effect of estrous stage,  $F_{1,26}= 6.5$ ,  $P=0.02$ ; interaction,  $F_{1,26}=0$ ,  $P=0.8$ ).

657 \*\* $P<0.01$ , \*\*\*\* $P<0.0001$ . N=18-22 per group. Bars and symbols reflect mean  $\pm$  standard error.

658 Heat maps scaled equivalently for males and females.

659

660

661

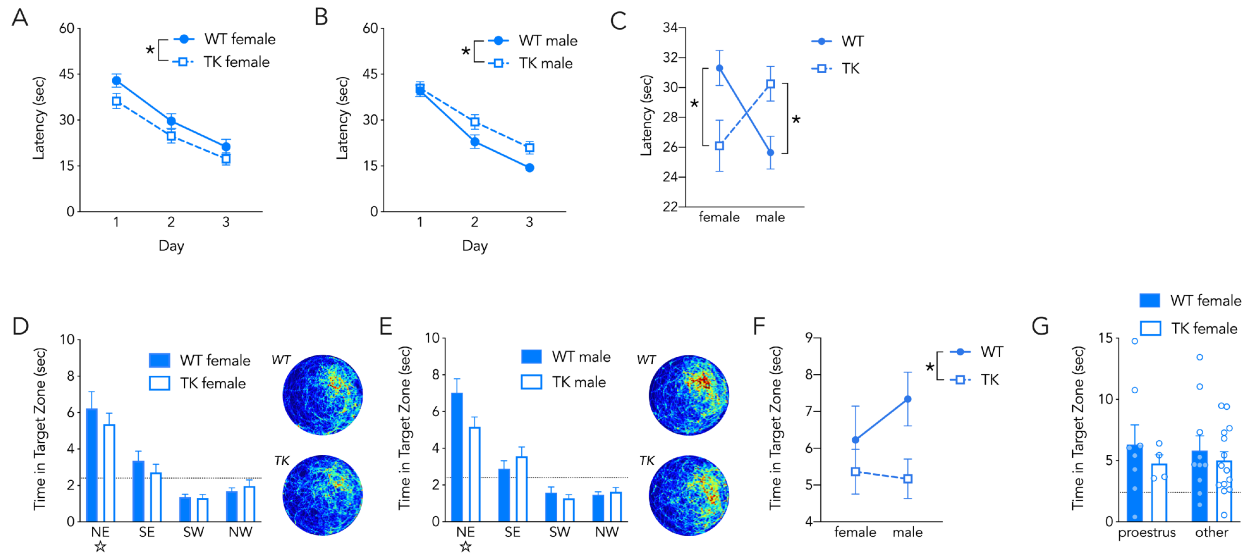

662

663

664

665

666

667

668

669

670

671

672

673

674

675

676

677

678

679

680

681

682

**Figure 4: Sex and neurogenesis regulate learning and memory in the 16°C water maze.** During acquisition, female (A) and male (B) reached the platform faster with successive days of training (3-way anova; effect of day,  $F_{2,156}=105$ ,  $P<0.0001$ ). There was no main effect of sex ( $F_{1,78}=0.3$ ,  $P=0.6$ ) or genotype ( $F_{1,78}=0.1$ ,  $P=0.8$ ) but there was a significant sex x genotype interaction ( $F_{1,78}=15$ ,  $P=0.0003$ ). Post hoc tests revealed that male WT rats learned faster than male TK rats ( $P=0.01$ ) and female WT rats learned slower than female TK rats ( $P=0.01$ ). C) Summary of average acquisition latencies in females and males. On the probe trial, female (D) and male (E) rats preferentially searched in the target (NE) zone where the platform was located during training. Dotted line indicates chance performance. There was no effect of sex on probe trial performance, but WT rats spent more time searching in the correct zone than TK rats (2-way anova; effect of genotype,  $F_{1,76}=5$ ,  $P=0.03$ ; effect of sex,  $F_{1,76}=0.4$ ,  $P=0.4$ ; interaction,  $F_{1,76}=0.9$ ,  $P=0.4$ ). F) Summary of time spent in the target zone of the probe trial for females and males. G) Estrous stage did not influence performance on the probe trial (2-way anova; effect of genotype,  $F_{1,32}=0$ ,  $P=0.9$ ; effect of estrous stage,  $F_{1,32}=0$ ,  $P=0.9$ ; interaction,  $F_{1,32}=0$ ,  $P=0.7$ ). \*\* $P<0.01$ , \*\*\*\* $P<0.0001$ . N=18-22 per group. Bars and symbols reflect mean  $\pm$  standard error. Heat maps for females and males are scaled equivalently and match those in Fig 2.

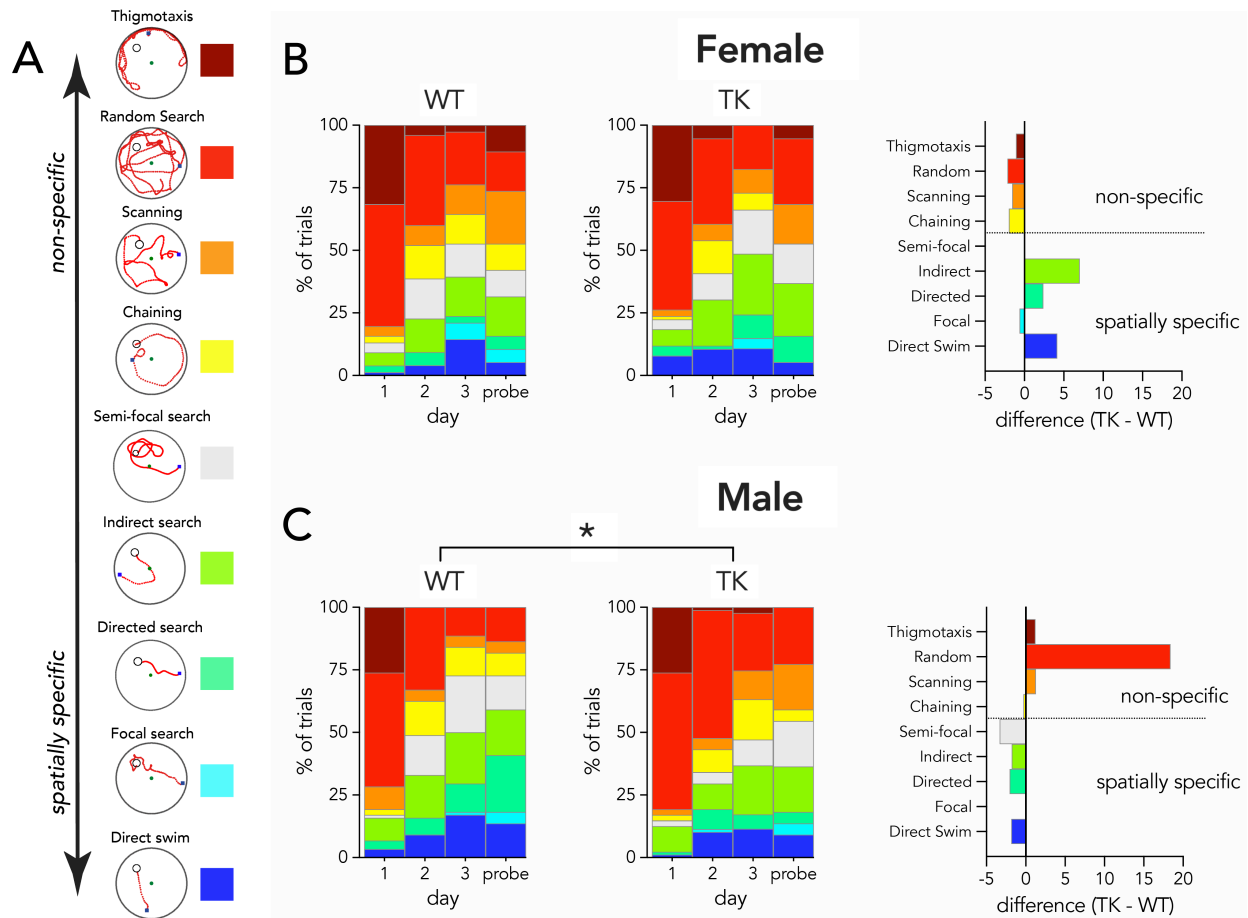

683  
684  
685  
686  
687  
688  
689  
690  
691  
692  
693  
694  
695  
696  
697  
698  
699  
700  
701

**Figure 5: In the 16°C water maze, blocking neurogenesis reduces spatially-specific search in male rats.** A) Example trials illustrating various search strategies classified by Pathfinder, organized by degree of spatial specificity relative to the target. B) Strategies employed by female WT and TK rats. The distribution of strategies in female TK rats was not significantly different from female WT rats ( $\chi^2 = 7$ ,  $P = 0.5$ ). Right-most graph shows weighted strategy changes in TK rats relative to WT rats, quantified as % changes in strategy usage multiplied by the total fraction of trials where rats employed that strategy (genotypes pooled). The magnitude of the bars therefore reflects changes in strategy but prevents misleading perceptual artefacts caused by large % changes for strategies that were rarely used. (C) Reducing neurogenesis significantly altered the distribution of strategies used by male rats, demonstrated by the greater proportion of spatially non-specific trials and the smaller proportion of spatially-specific trials (right;  $\chi^2 = 17$ ,  $P = 0.02$ ).

702  
703

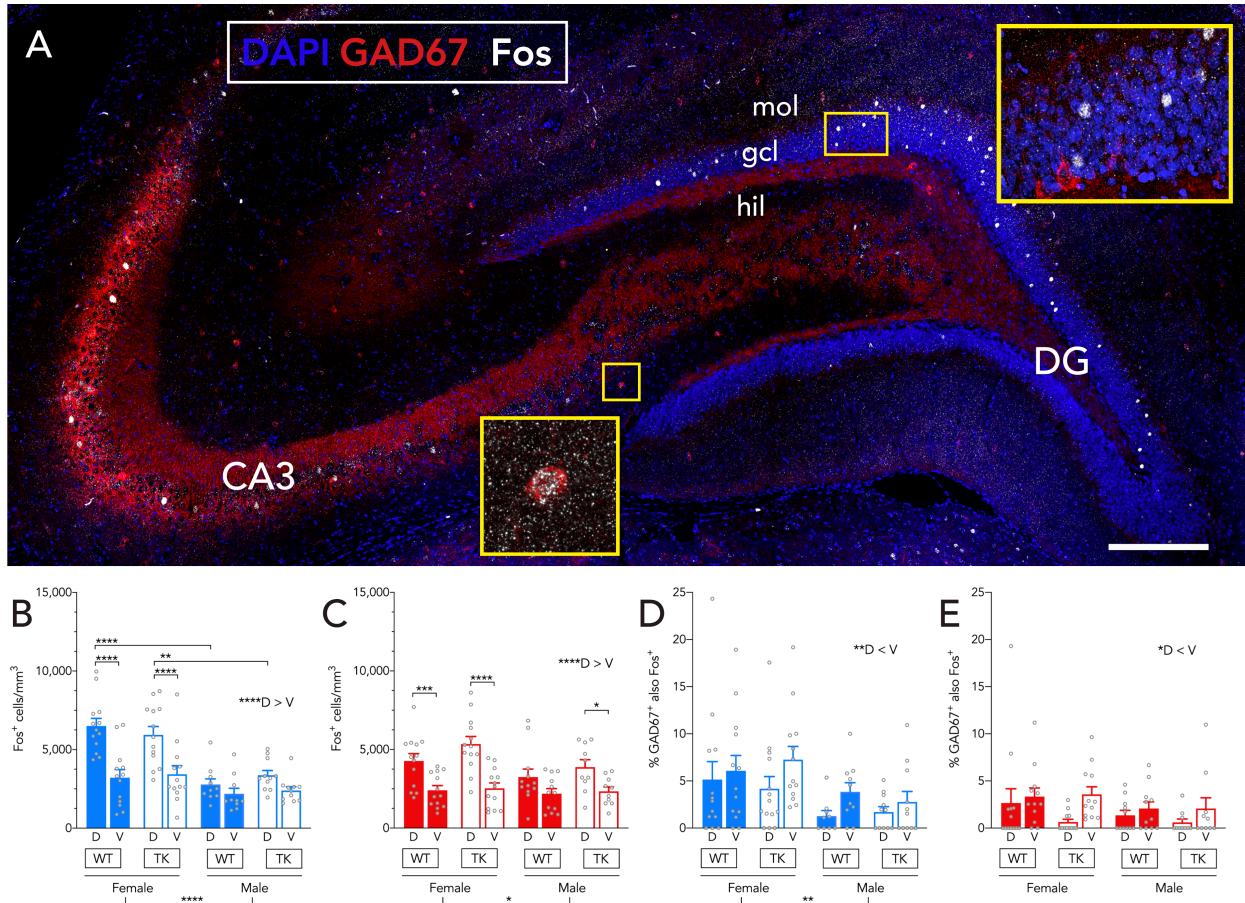

704  
705

706 **Figure 6: Sex- and subregion-based activation of DG-CA3 neurons.** A) Confocal image of dorsal  
707 hippocampus immunostained for GAD67 and Fos. Scale bar, 200  $\mu$ m. B) In the 16°C water maze,  
708 there were more Fos<sup>+</sup> cells in the dorsal granule cell layer, particularly in female rats. The density of  
709 Fos<sup>+</sup> cells was also greater in the dorsal DG of females than in males (3 way RM ANOVA; effect of  
710 subregion:  $F_{1,43}=52$ ,  $P<0.0001$ ; effect of sex:  $F_{1,43}=31$ ,  $P<0.0001$ ; effect of genotype:  $F_{1,43}=0.1$ ,  
711  $P=0.8$ ; subregion x sex interaction:  $F_{1,43}=17$ ,  $P=0.0002$ ; all other interactions  $P>0.25$ ). C) In the 25°C  
712 water maze, there were more Fos<sup>+</sup> cells in females and in the dorsal granule cell layer, but there  
713 were no subregion-specific differences between the sexes (3 way RM ANOVA; effect of subregion:  
714  $F_{1,44}=74$ ,  $P<0.0001$ ; effect of sex:  $F_{1,44}=4.2$ ,  $P=0.048$ ; effect of genotype:  $F_{1,44}=1.9$ ,  $P=0.2$ ; subregion  
715 x sex interaction:  $F_{1,44}=6$ ,  $P=0.02$ ; all other interactions  $P>0.09$ ). D) In the 16°C water maze, there  
716 were more GAD67<sup>+</sup>Fos<sup>+</sup> cells females and in the ventral granule cell layer (mixed effects analysis;  
717 effect of subregion:  $F_{1,42}=8$ ,  $P=0.006$ ; effect of sex:  $F_{1,44}=8$ ,  $P=0.009$ ; effect of genotype:  $F_{1,44}=0.0$ ,  
718  $P=0.99$ ; all interactions:  $P>0.17$ ). E) In the 25°C water maze, there were more GAD67<sup>+</sup>Fos<sup>+</sup> cells in  
719 the ventral hippocampus but there were no sex or genotype differences (mixed effects analysis;  
720 effect of subregion:  $F_{1,40}=5.2$ ,  $P=0.03$ ; effect of sex:  $F_{1,43}=2.5$ ,  $P=0.12$ ; effect of genotype:  $F_{1,43}=0.9$ ,  
721  $P=0.3$ ; all interactions:  $P>0.24$ ). Bars indicate mean  $\pm$  s.e.m. mol, molecular layer; gcl, granule cell  
722 layer; hil, hilus; D, dorsal; V, ventral. \* $P<0.05$ , \*\* $P<0.01$ , \*\*\* $P<0.001$ , \*\*\*\* $P<0.0001$ .

723

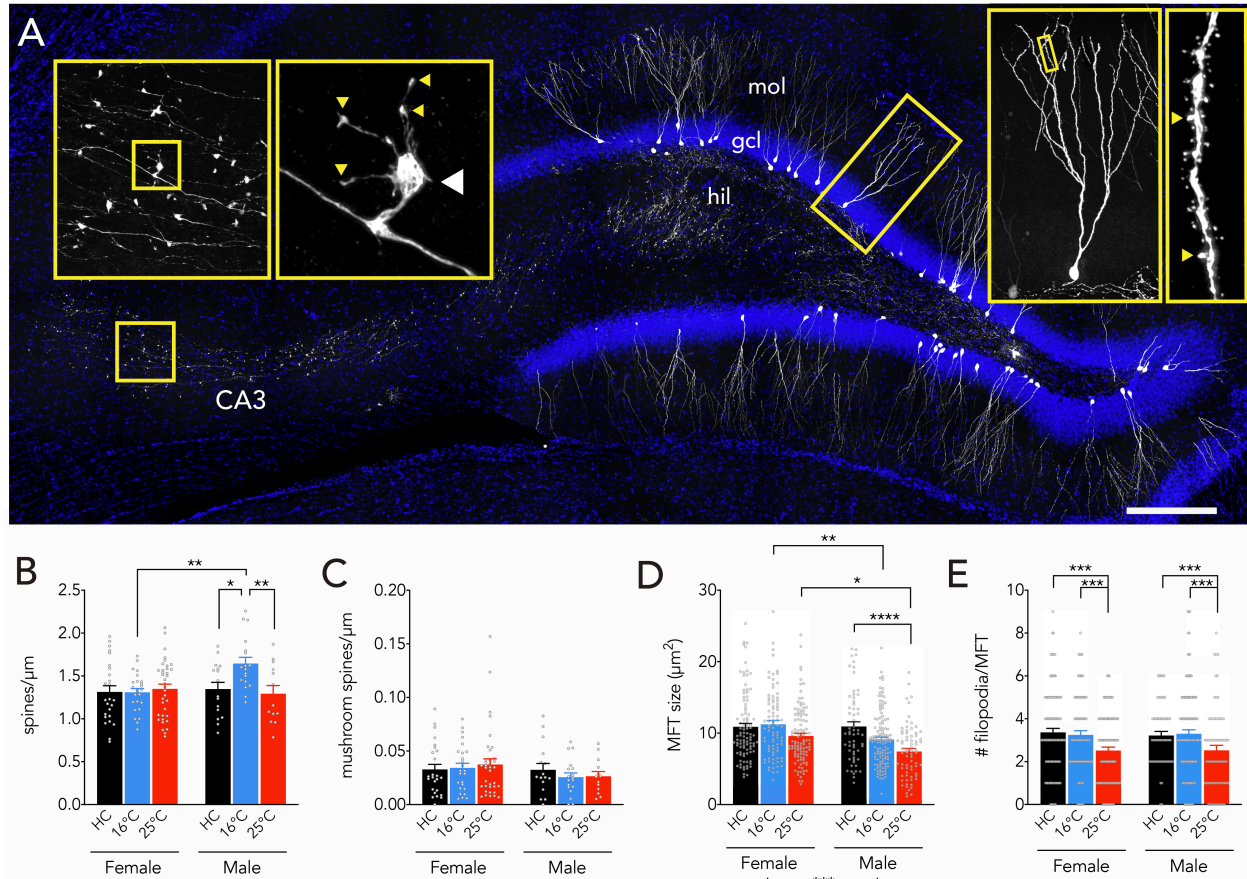

724  
725

726 **Figure 7: Training reveals sex- and temperature-dependent plasticity.** A) Retroviral GFP labelling of  
727 adult-born neurons in the dentate gyrus, with axons projecting to CA3. Right insets display an isolated  
728 neuron (reconstructed across sections, hence the greater number of dendrites) and dendrite (arrowheads  
729 indicate mushroom spines). Left insets display a large mossy fiber terminal (MFT); white arrowhead  
730 indicates the MFT and yellow arrowheads indicate putative presynaptic filopodial contacts onto  
731 inhibitory interneurons. Scale bar, 250  $\mu\text{m}$ . hil, hilus; gcl, granule cell layer; mol, molecular layer. B)  
732 Adult-born neuron spine density was selectively increased in male rats that were trained at 16°C (2 way  
733 anova; effect of treatment:  $F_{2,127}=3.1$ ,  $P=0.0495$ ; effect of sex:  $F_{1,127}=3.2$ ,  $P=0.08$ ; interaction:  $F_{2,127}=4.2$ ,  
734  $P=0.02$ ; Male home cage (HC) vs 16°C:  $P=0.01$ ; male HC vs 25°C:  $P=0.7$ ; male 16°C vs 25°C:  $P=0.009$ ;  
735 female group comparisons all  $P>0.95$ ; male vs female at 16°C:  $P=0.003$ ; male vs female HC and male vs  
736 female at 25°C both  $P>0.8$ ). C) Adult-born neuron mushroom spine density was not altered by sex or  
737 training (2 way anova; effect of treatment:  $F_{2,127}=0.1$ ,  $P=0.12$ ; effect of sex:  $F_{1,127}=2.0$ ,  $P=0.15$ ; interaction:  
738  $F_{2,127}=0.5$ ,  $P=0.6$ ; ). D) MFTs were larger in adult-born neurons from female rats, an effect that was driven  
739 by greater training-related reduction in terminal size in males (2 way anova; effect of sex,  $F_{1,539} = 14$ ,  
740  $P=0.0002$ ; effect of training condition  $F_{2,539}=13$ ,  $P<0.0001$ ; interaction,  $F_{2,539}=3.5$ ,  $P=0.03$ ; male HC vs  
741 male 16°C,  $P=0.06$ ; male HC vs male 25°C,  $P<0.0001$ ; female HC vs female 16°C and 25°C both  $P>0.18$ ;  
742 male HC vs female HC,  $P=0.9$ ; male 16°C vs female 16°C,  $P=0.005$ ; male 25°C vs female 25°C,  $P=0.01$ ).  
743 E) The number of MFT-associated filopodia, putative synapses onto inhibitory neurons, was reduced in  
744 the 25°C group but was not different between sexes (2 way anova; effect of training condition,  $F_{2,545}=9$ ,  
745  $P<0.0001$ , effect of sex,  $F_{1,545}=0$ ,  $P=0.9$ ; interaction,  $F_{2,545}=0.1$ ,  $P=0.9$ ). Bars indicate mean  $\pm$  s.e.m. mol,  
746 molecular layer; gcl, granule cell layer; hil, hilus. \* $P<0.05$ , \*\* $P<0.01$ , \*\*\* $P<0.001$ , \*\*\*\* $P<0.0001$ .



747 REFERENCES

748

- 749 1. T. J. Shors, *et al.*, Neurogenesis in the adult is involved in the formation of trace memories.  
750 *Nature* 410, 372–376 (2001).
- 751 2. T. J. Shors, D. A. Townsend, M. Zhao, Y. Kozorovitskiy, E. Gould, Neurogenesis may relate  
752 to some but not all types of hippocampal-dependent learning. *Hippocampus* 12, 578–584 (2002).
- 753 3. D. o Seo, M. A. Carillo, S. C.-H. Lim, K. F. Tanaka, M. R. Drew, Adult Hippocampal  
754 Neurogenesis Modulates Fear Learning through Associative and Nonassociative Mechanisms.  
755 *The Journal of neuroscience : the official journal of the Society for Neuroscience* 35, 11330–  
756 11345 (2015).
- 757 4. C. D. Clelland, *et al.*, A functional role for adult hippocampal neurogenesis in spatial pattern  
758 separation. 325, 210–213 (2009).
- 759 5. G. Winocur, J. M. Wojtowicz, M. Sekeres, J. S. Snyder, S. Wang, Inhibition of neurogenesis  
760 interferes with hippocampus-dependent memory function. *Hippocampus* 16, 296–304 (2006).
- 761 6. M. D. Saxe, *et al.*, Ablation of hippocampal neurogenesis impairs contextual fear conditioning  
762 and synaptic plasticity in the dentate gyrus. *Proceedings of the National Academy of Sciences of*  
763 *the United States of America* 103, 17501–17506 (2006).
- 764 7. S. Jessberger, *et al.*, Dentate gyrus-specific knockdown of adult neurogenesis impairs spatial  
765 and object recognition memory in adult rats. *Learning & memory (Cold Spring Harbor, NY)* 16,  
766 147–154 (2009).
- 767 8. C. A. Denny, N. S. Burghardt, D. M. Schachter, R. Hen, M. R. Drew, 4- to 6-week-old adult-  
768 born hippocampal neurons influence novelty-evoked exploration and contextual fear  
769 conditioning. *Hippocampus* 22, 1188–1201 (2012).
- 770 9. E. C. Cope, *et al.*, Adult-Born Neurons in the Hippocampus Are Essential for Social Memory  
771 Maintenance. *Eneuro* 7, ENEURO.0182-20.2020 (2020).
- 772 10. T. Kitamura, *et al.*, Adult neurogenesis modulates the hippocampus-dependent period of  
773 associative fear memory. *Cell* 139, 814–827 (2009).
- 774 11. D. Kumar, *et al.*, Sparse Activity of Hippocampal Adult-Born Neurons during REM Sleep Is  
775 Necessary for Memory Consolidation. *Neuron* (2020)  
776 <https://doi.org/10.1016/j.neuron.2020.05.008>.
- 777 12. K. G. Akers, *et al.*, Hippocampal Neurogenesis Regulates Forgetting During Adulthood and  
778 Infancy. *Science (New York, NY)* 344, 598–602 (2014).

- 779 13. N. S. Burghardt, E. H. Park, R. Hen, A. A. Fenton, Adult-born hippocampal neurons promote  
780 cognitive flexibility in mice. *Hippocampus* 22, 1795–1808 (2012).
- 781 14. A. Garthe, J. Behr, G. Kempermann, Adult-generated hippocampal neurons allow the  
782 flexible use of spatially precise learning strategies. *PLoS ONE* 4, e5464 (2009).
- 783 15. R. Q. Yu, M. Cooke, D. R. Seib, J. Zhao, J. S. Snyder, Adult neurogenesis promotes  
784 efficient, nonspecific search strategies in a spatial alternation water maze task. *Behav Brain Res*  
785 376, 112151 (2019).
- 786 16. A. A. Swan, *et al.*, Characterization of the role of adult neurogenesis in touch-screen  
787 discrimination learning. *Hippocampus* 24, 1581–1591 (2014).
- 788 17. T. M. Madsen, P. E. G. Kristjansen, T. G. Bolwig, G. Wörtwein, Arrested neuronal  
789 proliferation and impaired hippocampal function following fractionated brain irradiation in the  
790 adult rat. *Neuroscience* 119, 635–642 (2003).
- 791 18. J. Raber, *et al.*, Radiation-induced cognitive impairments are associated with changes in  
792 indicators of hippocampal neurogenesis. *Radiation research* 162, 39–47 (2004).
- 793 19. J. S. Snyder, N. S. Hong, R. J. McDonald, J. M. Wojtowicz, A role for adult neurogenesis in  
794 spatial long-term memory. *Neuroscience* 130, 843–852 (2005).
- 795 20. C. A. Blaiss, *et al.*, Temporally Specified Genetic Ablation of Neurogenesis Impairs  
796 Cognitive Recovery after Traumatic Brain Injury. *J Neurosci* 31, 4906–4916 (2011).
- 797 21. C. G. Nickell, K. R. Thompson, J. R. Pauly, K. Nixon, Recovery of Hippocampal-Dependent  
798 Learning Despite Blunting Reactive Adult Neurogenesis After Alcohol Dependence. *Adv Neurol*  
799 6, 83–101 (2020).
- 800 22. J. O. Groves, *et al.*, Ablating Adult Neurogenesis in the Rat Has No Effect on Spatial  
801 Processing: Evidence from a Novel Pharmacogenetic Model. *PLoS genetics* 9, e1003718 (2013).
- 802 23. J. S. Snyder, A. Soumier, M. Brewer, J. Pickel, H. A. Cameron, Adult hippocampal  
803 neurogenesis buffers stress responses and depressive behaviour. *Nature* 476, 458–461 (2011).
- 804 24. J.-M. Revest, *et al.*, Adult hippocampal neurogenesis is involved in anxiety-related  
805 behaviors. *Molecular psychiatry* 14, 959–967 (2009).
- 806 25. M. L. Lehmann, R. A. Brachman, K. Martinowich, R. J. Schloesser, M. Herkenham,  
807 Glucocorticoids Orchestrate Divergent Effects on Mood through Adult Neurogenesis. *The*  
808 *Journal of neuroscience : the official journal of the Society for Neuroscience* 33, 2961–2972  
809 (2013).
- 810 26. A. Surget, *et al.*, Antidepressants recruit new neurons to improve stress response regulation.  
811 *Molecular psychiatry* 16, 1177–1188 (2011).

- 812 27. C. Anacker, *et al.*, Hippocampal neurogenesis confers stress resilience by inhibiting the  
813 ventral dentate gyrus. *Nature* 559, 1–22 (2018).
- 814 28. D. C. Lagace, *et al.*, Adult hippocampal neurogenesis is functionally important for stress-  
815 induced social avoidance. *Proceedings of the National Academy of Sciences* 107, 4436–4441  
816 (2010).
- 817 29. T. J. Schoenfeld, *et al.*, New neurons restore structural and behavioral abnormalities in a rat  
818 model of PTSD. *Hippocampus* 29, 848–861 (2019).
- 819 30. B. Roozendaal, J. L. McGaugh, Memory modulation. *Behavioral neuroscience* 125, 797–824  
820 (2011).
- 821 31. D. A. Bangasser, T. J. Shors, Critical brain circuits at the intersection between stress and  
822 learning. *Neuroscience and biobehavioral reviews* 34, 1223–1233 (2010).
- 823 32. T. J. Schoenfeld, J. A. Smith, A. N. Sonti, H. A. Cameron, Adult neurogenesis alters  
824 response to an aversive distractor in a labyrinth maze without affecting spatial learning or  
825 memory. *Hippocampus* (2020) <https://doi.org/10.1002/hipo.23267>.
- 826 33. M. R. Drew, C. A. Denny, R. Hen, Arrest of adult hippocampal neurogenesis in mice impairs  
827 single- but not multiple-trial contextual fear conditioning. *Behavioral neuroscience* 124, 446–  
828 454 (2010).
- 829 34. R. C. Kessler, M. Petukhova, N. A. Sampson, A. M. Zaslavsky, H. Wittchen, Twelve-month  
830 and lifetime prevalence and lifetime morbid risk of anxiety and mood disorders in the United  
831 States. *Int J Method Psych* 21, 169–184 (2012).
- 832 35. C. Chow, J. R. Epp, S. E. Lieblich, C. K. Barha, L. A. M. Galea, Sex differences in  
833 neurogenesis and activation of new neurons in response to spatial learning and memory.  
834 *Psychoneuroendocrinology* 38, 1236–1250 (2013).
- 835 36. S. Yagi, *et al.*, Sex Differences in Maturation and Attrition of Adult Neurogenesis in the  
836 Hippocampus. *Eneuro* 7, ENEURO.0468-19.2020 (2020).
- 837 37. S. Yagi, C. Chow, S. E. Lieblich, L. A. M. Galea, Sex and strategy use matters for pattern  
838 separation, adult neurogenesis, and immediate early gene expression in the hippocampus.  
839 *Hippocampus* 26, 87–101 (2016).
- 840 38. J. M. Juraska, J. M. Fitch, C. Henderson, N. Rivers, Sex differences in the dendritic  
841 branching of dentate granule cells following differential experience. *Brain research* 333, 73–80  
842 (1985).
- 843 39. S. G. Warren, A. G. Humphreys, J. M. Juraska, W. T. Greenough, LTP varies across the  
844 estrous cycle: enhanced synaptic plasticity in proestrus rats. *Brain research* 703, 26–30 (1995).

- 845 40. T. J. Shors, C. Chua, J. Falduto, Sex differences and opposite effects of stress on dendritic  
846 spine density in the male versus female hippocampus. *The Journal of neuroscience : the official*  
847 *journal of the Society for Neuroscience* 21, 6292–6297 (2001).
- 848 41. H. E. Scharfman, N. J. MacLusky, Differential regulation of BDNF, synaptic plasticity and  
849 sprouting in the hippocampal mossy fiber pathway of male and female rats. *Neuropharmacology*  
850 76 Pt C, 696–708 (2014).
- 851 42. V. Luine, Sex differences in chronic stress effects on memory in rats. *Stress (Amsterdam,*  
852 *Netherlands)* 5, 205–216 (2002).
- 853 43. C. D. Conrad, *et al.*, Acute stress impairs spatial memory in male but not female rats:  
854 influence of estrous cycle. *Pharmacology, biochemistry, and behavior* 78, 569–579 (2004).
- 855 44. D. A. Bangasser, T. J. Shors, The hippocampus is necessary for enhancements and  
856 impairments of learning following stress. *Nature neuroscience* 10, 1401–1403 (2007).
- 857 45. A. K. Beery, I. Zucker, Sex bias in neuroscience and biomedical research. *Neuroscience and*  
858 *biobehavioral reviews* 35, 565–572 (2011).
- 859 46. K. A. Huckleberry, R. M. Shansky, The unique plasticity of hippocampal adult-born neurons:  
860 Contributing to a heterogeneous dentate. *Hippocampus* (2021)  
861 <https://doi.org/10.1002/hipo.23318>.
- 862 47. K. Roughton, M. Kalm, K. Blomgren, Sex-dependent differences in behavior and  
863 hippocampal neurogenesis after irradiation to the young mouse brain. *The European journal of*  
864 *neuroscience* 36, 2763–2772 (2012).
- 865 48. J. S. Snyder, *et al.*, A Transgenic Rat for Specifically Inhibiting Adult Neurogenesis. *eneuro*  
866 3 (2016).
- 867 49. C. Sandi, M. Loscertales, C. Guaza, Experience-dependent facilitating effect of  
868 corticosterone on spatial memory formation in the water maze. *The European journal of*  
869 *neuroscience* 9, 637–642 (1997).
- 870 50. B. Salehi, M. I. Cordero, C. Sandi, Learning under stress: the inverted-U-shape function  
871 revisited. *Learning & memory (Cold Spring Harbor, NY)* 17, 522–530 (2010).
- 872 51. M. Gallagher, R. Burwell, M. Burchinal, Severity of spatial learning impairment in aging:  
873 development of a learning index for performance in the Morris water maze. *Behavioral*  
874 *neuroscience* 107, 618–626 (1993).
- 875 52. M. B. Cooke, *et al.*, Pathfinder: open source software for analyzing spatial navigation search  
876 strategies. *F1000research* 8, 1521 (2019).

- 877 53. D. R. Seib, *et al.*, Hippocampal neurogenesis promotes preference for future rewards. *Mol*  
878 *Psychiatr*, 1–19 (2021).
- 879 54. A. C. McLean, N. Valenzuela, S. Fai, S. A. L. Bennett, Performing vaginal lavage, crystal  
880 violet staining, and vaginal cytological evaluation for mouse estrous cycle staging identification.  
881 *Journal of visualized experiments : JoVE*, e4389 (2012).
- 882 55. L. Acsády, A. Kamondi, A. Sik, T. Freund, G. Buzsáki, GABAergic cells are the major  
883 postsynaptic targets of mossy fibers in the rat hippocampus. *The Journal of neuroscience : the*  
884 *official journal of the Society for Neuroscience* 18, 3386–3403 (1998).
- 885 56. L. Restivo, Y. Niibori, V. Mercaldo, S. A. Josselyn, P. W. Frankland, Development of Adult-  
886 Generated Cell Connectivity with Excitatory and Inhibitory Cell Populations in the  
887 Hippocampus. *The Journal of neuroscience : the official journal of the Society for Neuroscience*  
888 35, 10600–10612 (2015).
- 889 57. D. R. Seib, E. Chahley, O. Princz-Lebel, J. S. Snyder, Intact memory for local and distal cues  
890 in male and female rats that lack adult neurogenesis. *PLoS ONE* 13, e0197869-15 (2018).
- 891 58. R. M. Shansky, Sex differences in behavioral strategies: avoiding interpretational pitfalls.  
892 *Curr Opin Neurobiol* 49, 95–98 (2018).
- 893 59. W. G. Brake, J. M. Lacasse, Sex differences in spatial navigation: the role of gonadal  
894 hormones. *Curr Opin Behav Sci* 23, 176–182 (2018).
- 895 60. J. S. Snyder, R. Radik, J. M. Wojtowicz, H. A. Cameron, Anatomical gradients of adult  
896 neurogenesis and activity: young neurons in the ventral dentate gyrus are activated by water  
897 maze training. *Hippocampus* 19, 360–370 (2009).
- 898 61. X. Liu, *et al.*, Optogenetic stimulation of a hippocampal engram activates fear memory  
899 recall. *Nature* 484, 381–385 (2012).
- 900 62. S. R. Erwin, *et al.*, A Sparse, Spatially Biased Subtype of Mature Granule Cell Dominates  
901 Recruitment in Hippocampal-Associated Behaviors. *Cell Reports* 31, 107551 (2020).
- 902 63. S. Ruediger, D. Spirig, F. Donato, P. Caroni, Goal-oriented searching mediated by ventral  
903 hippocampus early in trial-and-error learning. *Nature neuroscience* 15, 1563–1571 (2012).
- 904 64. L. J. Drew, *et al.*, Activation of local inhibitory circuits in the dentate gyrus by adult-born  
905 neurons. *Hippocampus* (2015) <https://doi.org/10.1002/hipo.22557>.
- 906 65. J. D. Cole, *et al.*, Adult-born hippocampal neurons undergo extended development and are  
907 morphologically distinct from neonatally-born neurons Prolonged development of adult-born  
908 neurons. *J Neurosci Official J Soc Neurosci*, JN-RM-1665-19 (2020).

- 909 66. J. T. Gonçalves, *et al.*, In vivo imaging of dendritic pruning in dentate granule cells. *Nature*  
910 *neuroscience* (2016) <https://doi.org/10.1038/nn.4301>.
- 911 67. C. Zhao, E. M. Teng, R. G. Summers, G.-L. Ming, F. H. Gage, Distinct Morphological  
912 Stages of Dentate Granule Neuron Maturation in the Adult Mouse Hippocampus. *The Journal of*  
913 *neuroscience : the official journal of the Society for Neuroscience* 26, 3–11 (2006).
- 914 68. S. Tronel, *et al.*, Spatial learning sculpts the dendritic arbor of adult-born hippocampal  
915 neurons. *Proceedings of the National Academy of Sciences* 107, 7963–7968 (2010).
- 916 69. V. Lemaire, *et al.*, Long-lasting plasticity of hippocampal adult-born neurons. *The Journal of*  
917 *neuroscience : the official journal of the Society for Neuroscience* 32, 3101–3108 (2012).
- 918 70. W. A. Koss, K. M. Frick, Sex differences in hippocampal function. *Journal of neuroscience*  
919 *research* 95, 539–562 (2017).
- 920 71. S. Yagi, L. A. M. Galea, Sex differences in hippocampal cognition and neurogenesis.  
921 *Neuropsychopharmacol* 44, 200–213 (2019).
- 922 72. D. Dupret, *et al.*, Spatial relational memory requires hippocampal adult neurogenesis. *PLoS*  
923 *ONE* 3, e1959 (2008).
- 924 73. A. Dranovsky, E. D. Leonardo, Is there a role for young hippocampal neurons in adaptation  
925 to stress? *Behavioural brain research* 227, 371–375 (2012).
- 926 74. Y. M. Ulrich-Lai, J. P. Herman, Neural regulation of endocrine and autonomic stress  
927 responses. *Nature reviews Neuroscience* 10, 397–409 (2009).
- 928 75. K. A. Huckleberry, *et al.*, Dorsal and ventral hippocampal adult-born neurons contribute to  
929 context fear memory. *Neuropsychopharmacology : official publication of the American College*  
930 *of Neuropsychopharmacology* 43, 2487–2496 (2018).
- 931 76. L. N. Miller, C. Weiss, J. F. Disterhoft, Genetic Ablation of Neural Progenitor Cells Impairs  
932 Acquisition of Trace Eyeblink Conditioning. *eneuro* 6, ENEURO.0251-19.2019 (2019).
- 933 77. N. C. Tronson, Focus on females: a less biased approach for studying strategies and  
934 mechanisms of memory. *Curr Opin Behav Sci* 23, 92–97 (2018).
- 935 78. B. A. Richards, *et al.*, Patterns across multiple memories are identified over time. *Nature*  
936 *neuroscience* 17, 981–986 (2014).
- 937 79. R. J. Steele, R. G. Morris, Delay-dependent impairment of a matching-to-place task with  
938 chronic and intrahippocampal infusion of the NMDA-antagonist D-AP5. *Hippocampus* 9, 118–  
939 136 (1999).

- 940 80. D. A. Bangasser, S. R. Eck, A. M. Telenson, M. Salvatore, Sex differences in stress  
941 regulation of arousal and cognition. *Physiol Behav* 187, 42–50 (2018).
- 942 81. T. J. Schoenfeld, H. C. McCausland, H. D. Morris, V. Padmanaban, H. A. Cameron, Stress  
943 and Loss of Adult Neurogenesis Differentially Reduce Hippocampal Volume. *Biological*  
944 *Psychiatry* 82, 1–34 (2017).
- 945 82. R. J. Schloesser, *et al.*, Atrophy of pyramidal neurons and increased stress-induced glutamate  
946 levels in CA3 following chronic suppression of adult neurogenesis. *Brain structure & function*  
947 (2013) <https://doi.org/10.1007/s00429-013-0532-8>.
- 948 83. C. S. S. Weeden, J. C. Mercurio, H. A. Cameron, A role for hippocampal adult neurogenesis  
949 in shifting attention toward novel stimuli. *Behav Brain Res* 376, 112152 (2019).
- 950 84. L. R. Glover, T. J. Schoenfeld, R.-M. Karlsson, D. M. Bannerman, H. A. Cameron, Ongoing  
951 neurogenesis in the adult dentate gyrus mediates behavioral responses to ambiguous threat cues.  
952 *PLoS biology* 15, e2001154 (2017).
- 953 85. S. Ruediger, *et al.*, Learning-related feedforward inhibitory connectivity growth required for  
954 memory precision. *Nature* 473, 514–518 (2011).
- 955 86. N. Guo, *et al.*, Dentate granule cell recruitment of feedforward inhibition governs engram  
956 maintenance and remote memory generalization. *Nature Publishing Group* 24, 438–449 (2018).
- 957 87. L. A. Galea, *et al.*, Sex differences in dendritic atrophy of CA3 pyramidal neurons in  
958 response to chronic restraint stress. *Neuroscience* 81, 689–697 (1997).
- 959 88. I. Galimberti, *et al.*, Long-Term Rearrangements of Hippocampal Mossy Fiber Terminal  
960 Connectivity in the Adult Regulated by Experience. *Neuron* 50, 749–763 (2006).
- 961 89. I. Galimberti, E. Bednarek, F. Donato, P. Caroni, EphA4 signaling in juveniles establishes  
962 topographic specificity of structural plasticity in the hippocampus. *Neuron* 65, 627–642 (2010).
- 963
